# Supplementary material for: Human Papillomavirus 16-Transgenic Mice as a Model to Study Cancer-Associated Cachexia
Source: PubMed Central journal article supplement (PMC7404304; doi:10.3390/ijms21145020), 2020-07-16
Supplement: ijms-21-05020-s001.pdf [file ijms-21-05020-s001.pdf]

**Supplementary Table S1.** Primer Sequences for Mice Genotyping.

| Primer Target Gene               | Sequence (5'- 3') |                                  | Amplicon size |
|----------------------------------|-------------------|----------------------------------|---------------|
| <b>HPV16 E7</b>                  | FORWARD           | GGAGGAGGATGAAATAGATGG            | 157 bp        |
|                                  | REVERSE           | GCCCATTAAGAGGTCTTCCAA            |               |
| <i><math>\beta</math>-globin</i> | FORWARD           | CCAATCTGCTCACACAGGATAGAGAGGGCAGG | 494 bp        |
|                                  | REVERSE           | CCTTGAGGCTGTCCAAGTGATTCAGGCCATCG |               |

**Supplementary Table S2.** Primers Sequences used for qPCR.

| Gene Name     | Gene Product                                   | Primers Sequences (5'- 3') |                              |
|---------------|------------------------------------------------|----------------------------|------------------------------|
| <i>Hprt</i>   | Hypoxanthine-guanine phosphoribosyltransferase | FORWARD                    | TGAAGAGCTACTGTAATGATCAGTCAAC |
|               |                                                | REVERSE                    | AGCAAGCTTGCAACCTTAACCA       |
| <i>Tbp</i>    | TATA binding protein                           | FORWARD                    | CAAACCCAGAATTGTTCTCCTT       |
|               |                                                | REVERSE                    | ATGTGGTCTTCTGAATCCCT         |
| <i>Fbxo32</i> | Atrogin-1                                      | FORWARD                    | GGGTGTATCGGATGGAGACC         |
|               |                                                | REVERSE                    | GTTGTAAGCACACAGGCAGG         |
